# Supplementary material
Source: PubMed Central journal article supplement (PMC7790069)
Supplement: tpmd200192.SD1.pdf [file tpmd200192.SD1.pdf]

**Supplemental Table 1:** p-value of each paired interaction effects

|                | Jt pain     | HA   | Eye pain    | Nausea      | Anorexia    | Sens. to light | Rash        | Malaise | Gum bleed | Hematemesis | Melena | Cough | Phlegm | SOB  | Rhinorrhea | Vomiting | Diarrhea |
|----------------|-------------|------|-------------|-------------|-------------|----------------|-------------|---------|-----------|-------------|--------|-------|--------|------|------------|----------|----------|
| Jt pain        |             |      |             |             |             |                |             |         |           |             |        |       |        |      |            |          |          |
| HA             | <b>0.13</b> |      |             |             |             |                |             |         |           |             |        |       |        |      |            |          |          |
| Eye pain       | 0.99        | 0.93 |             |             |             |                |             |         |           |             |        |       |        |      |            |          |          |
| Nausea         | <b>0.15</b> | 0.88 | 0.85        |             |             |                |             |         |           |             |        |       |        |      |            |          |          |
| Anorexia       | <b>0.10</b> | 0.76 | 0.64        | 0.99        |             |                |             |         |           |             |        |       |        |      |            |          |          |
| Sens. to light | 0.52        | 0.29 | 0.82        | 0.82        | 0.91        |                |             |         |           |             |        |       |        |      |            |          |          |
| Rash           | 0.60        | 0.98 | <b>0.10</b> | 0.66        | <b>0.24</b> | 0.73           |             |         |           |             |        |       |        |      |            |          |          |
| Malaise        | 0.99        | 0.99 | 0.99        | 0.99        | 0.99        | 0.99           | 0.99        |         |           |             |        |       |        |      |            |          |          |
| Gum bleed      | 0.99        | NA   | 0.58        | 0.99        | NA          | 0.79           | 0.31        | NA      |           |             |        |       |        |      |            |          |          |
| Hematemesis    | NA          | NA   | NA          | NA          | NA          | NA             | NA          | NA      | NA        |             |        |       |        |      |            |          |          |
| Melena         | NA          | NA   | NA          | NA          | NA          | NA             | NA          | NA      | NA        | NA          |        |       |        |      |            |          |          |
| Cough          | 0.99        | 0.74 | 0.32        | 0.29        | 0.99        | <b>0.12</b>    | 0.29        | NA      | NA        | NA          | NA     |       |        |      |            |          |          |
| Phlegm         | NA          | NA   | 0.99        | 0.99        | NA          | 0.99           | 0.57        | NA      | NA        | NA          | NA     | 0.99  |        |      |            |          |          |
| SOB            | 0.99        | 0.99 | 0.99        | 0.99        | 0.99        | 0.61           | <b>0.24</b> | 0.99    | 0.99      | NA          | NA     | 0.48  | 0.99   |      |            |          |          |
| Rhinorrhea     | NA          | 0.91 | 0.26        | 0.74        | NA          | 0.48           | 0.90        | NA      | NA        | NA          | NA     | 0.59  | 0.31   | 0.99 |            |          |          |
| Vomiting       | 0.99        | 0.99 | <b>0.03</b> | 0.99        | NA          | 0.54           | <b>0.19</b> | 0.99    | 0.99      | NA          | NA     | 0.93  | 0.99   | 0.97 | 0.67       |          |          |
| Diarrhea       | 0.55        | 0.76 | <b>0.13</b> | <b>0.08</b> | 0.99        | 0.42           | 0.31        | 0.99    | 0.99      | NA          | NA     | 0.34  | 0.99   | 0.99 | 0.26       | 0.69     |          |

**Supplemental Table 2:** Infection status of each participants based on presence of shortness of breath

|                         | <b>Positive for SOB</b> | <b>Negative for SOB</b> |
|-------------------------|-------------------------|-------------------------|
| <b>Negative</b>         | 3                       | 46                      |
| negative                | 2                       | 42                      |
| CHIKV                   | 1                       | 2                       |
| YFV                     | 0                       | 2                       |
| <b>Primary dengue</b>   | 10                      | 45                      |
| DENV-1                  | 5                       | 11                      |
| DENV-2                  | 4                       | 18                      |
| DENV-3                  | 1                       | 12                      |
| DENV-4                  | 0                       | 4                       |
| <b>Secondary dengue</b> | 16                      | 20                      |

**Supplemental Table 3:** Infection status of each participants based on presence of severe joint/bone/muscle pain

|                         | <b>Positive for joint pain</b> | <b>Negative for joint pain</b> |
|-------------------------|--------------------------------|--------------------------------|
| <b>Negative</b>         | 45                             | 4                              |
| negative                | 40                             | 4                              |
| CHIKV                   | 3                              | 0                              |
| YFV                     | 2                              | 0                              |
| <b>Primary dengue</b>   | 39                             | 16                             |
| DENV-1                  | 9                              | 7                              |
| DENV-2                  | 17                             | 5                              |
| DENV-3                  | 11                             | 2                              |
| DENV-4                  | 2                              | 2                              |
| <b>Secondary dengue</b> | 31                             | 5                              |

**Supplemental Table 4:** Infection status of each participants based on presence of rash

|                         | <b>Positive for rash</b> | <b>Negative for rash</b> |
|-------------------------|--------------------------|--------------------------|
| <b>Negative</b>         | 14                       | 35                       |
| negative                | 10                       | 34                       |
| CHIKV                   | 3                        | 0                        |
| YFV                     | 1                        | 1                        |
| <b>Primary dengue</b>   | 33                       | 22                       |
| DENV-1                  | 7                        | 9                        |
| DENV-2                  | 13                       | 9                        |
| DENV-3                  | 9                        | 4                        |
| DENV-4                  | 4                        | 0                        |
| <b>Secondary dengue</b> | 17                       | 19                       |

**Supplemental Table 5:** Multiple logistic regression model that includes all variables available.

|                      | Est.         | Std. Error | P-value | Crude ORS             | Est. Adj.             | 95% C.I.   |
|----------------------|--------------|------------|---------|-----------------------|-----------------------|------------|
|                      | Coefficients |            |         | ORs                   |                       |            |
| (Intercept)          | 1.26         | 1.18       | 0.29    |                       |                       |            |
| Jt/bone/muscle pain  | -1.87        | 0.77       | 0.02    | 0.30                  | 0.15                  | 0.03-0.70  |
| Headache             | -0.13        | 0.66       | 0.84    | 0.57                  | 0.88                  | 0.24-3.18  |
| Eye pain             | 0.24         | 0.48       | 0.61    | 1.37                  | 1.28                  | 0.50-3.25  |
| Nausea               | -0.61        | 0.53       | 0.25    | 0.62                  | 0.55                  | 0.19-1.54  |
| Anorexia             | -0.04        | 0.87       | 0.96    | 0.65                  | 0.96                  | 0.18-5.26  |
| Sensitivity to Light | 0.11         | 0.48       | 0.82    | 1.25                  | 1.11                  | 0.44-2.83  |
| Rash                 | 1.09         | 0.45       | 0.02    | 3.05                  | 2.96                  | 1.22-7.23  |
| Malaise              | 0.61         | 1.40       | 0.66    | 0.36                  | 1.85                  | 0.12-28.93 |
| Gum Bleeding         | -1.97        | 1.09       | 0.07    | 0.34                  | 0.14                  | 0.02-1.18  |
| Hematemesis          | -14.44       | 1455.4     | 0.99    | $2.49 \times 10^{-7}$ | $5.36 \times 10^{-7}$ | -          |
| Melena               | 11.33        | 1455.4     | 0.99    | $1.15 \times 10^6$    | $8.34 \times 10^4$    | -          |
| Cough                | 0.84         | 0.70       | 0.23    | 0.93                  | 2.31                  | 0.58-9.11  |

|                  |       |      |       |       |       |             |
|------------------|-------|------|-------|-------|-------|-------------|
| Productive Cough | -0.34 | 1.27 | 0.79  | 1.08  | 0.71  | 0.06-8.51   |
| SOB              | 2.97  | 0.90 | 0.001 | 6.133 | 19.42 | 3.32-113.79 |
| Rhinorrhea       | -1.65 | 0.83 | 0.05  | 0.536 | 0.19  | 0.04-0.97   |
| Vomit            | 0.70  | 0.60 | 0.24  | 1.10  | 2.02  | 0.63-6.51   |
| Diarrhea         | -0.39 | 0.49 | 0.42  | 0.739 | 0.68  | 0.26-1.76   |
